# Supplementary material for: Perceived Neighborhood Characteristics and Cognitive Functioning among Diverse Older Adults: An Intersectional Approach
Source: MDPI journal article supplement (doi:10.3390/ijerph18052661), 2021-03-06
Supplement: s1 [file s1]

**Supplemental Table S1.** Skewness and Kurtosis for Key Continuous Variables ( $n = 8023$ ).

| Variable                     | Skewness | Kurtosis |
|------------------------------|----------|----------|
| Cognitive Functioning        | -0.64    | 3.75     |
| Years of Education           | -0.83    | 4.93     |
| Neighborhood Characteristic  |          |          |
| Unsafe                       | 1.10     | 3.43     |
| Unclean                      | 1.23     | 3.89     |
| Discohesive                  | 1.19     | 4.02     |
| Age                          | 0.59     | 2.80     |
| Number of Chronic Conditions | 0.31     | 2.80     |
| Ln Income                    | 15.92    | 508.17   |
| Ln Wealth                    | 9.88     | 192.73   |

**Supplemental Table S2.** Linear Regression Models of Associations between Cognitive Functioning and Perceived Neighborhood Characteristics by Gender and Years of Education among non-Hispanic White Older Adults ( $n = 6616$ ).

|                             | Unsafe                    | Unclean                   | Social Dis cohesion       |
|-----------------------------|---------------------------|---------------------------|---------------------------|
| Variable                    | b (SE)                    | b (SE)                    | b (SE)                    |
| Neighborhood Characteristic | -0.51* (0.20)             | -0.58** (0.20)            | -0.95** (0.27)            |
| Woman                       | 1.43*** (0.18)            | 1.33*** (0.22)            | 1.11*** (0.20)            |
| Education                   | 0.40*** (0.04)            | 0.39*** (0.04)            | 0.33*** (0.05)            |
| Woman x Neighborhood        |                           |                           |                           |
| Characteristic              | -0.06 (0.06)              | -0.02 (0.08)              | 0.07 (0.07)               |
| Education x Neighborhood    |                           |                           |                           |
| Characteristic              | 0.03* (0.01)              | 0.04** (0.01)             | 0.06** (0.02)             |
| Age                         | -0.19*** (0.01)           | -0.20*** (0.01)           | -0.20*** (0.01)           |
| Wave                        |                           |                           |                           |
| 2010 (reference)            |                           |                           |                           |
| 2012                        | -0.02 (0.10)              | -0.03 (0.10)              | -0.02 (0.10)              |
| 2014                        | -0.57 (0.25)              | -0.57* (0.25)             | -0.56* (0.25)             |
| 2016                        | -0.52 (0.34)              | -0.53 (0.33)              | -0.52 (0.34)              |
| Foreign Born                | -0.65* (0.28)             | -0.64* (0.28)             | -0.65* (0.28)             |
| Married/Partnered           | -0.35* (0.13)             | -0.35* (0.13)             | -0.35* (0.13)             |
| Ln Income                   | 1.14*** (0.18)            | 1.14*** (0.18)            | 1.16*** (0.18)            |
| Ln Wealth                   | 0.03 (0.03)               | 0.04 (0.03)               | 0.03 (0.03)               |
| Obese                       | 0.48*** (0.13)            | 0.47*** (0.13)            | 0.48*** (0.13)            |
| Moderate/Vigorous Activity  |                           |                           |                           |
| Never (reference)           |                           |                           |                           |
| Sometimes                   | 0.64*** (0.13)            | 0.64*** (0.13)            | 0.63*** (0.13)            |
| Often                       | 0.76*** (0.13)            | 0.77*** (0.13)            | 0.75*** (0.13)            |
| Smoking Status              |                           |                           |                           |
| Never Smoked (reference)    |                           |                           |                           |
| Former Smoker               | 0.14 (0.13)               | 0.14 (0.13)               | 0.14 (0.13)               |
| Current Smoker              | -0.41 <sup>†</sup> (0.24) | -0.41 <sup>†</sup> (0.23) | -0.41 <sup>†</sup> (0.24) |
| Alcohol Use                 |                           |                           |                           |
| No Consumption (reference)  |                           |                           |                           |
| Moderate Consumption        | 0.61*** (0.11)            | 0.62*** (0.11)            | 0.63*** (0.11)            |
| Heavy Consumption           | 0.68** (0.23)             | 0.70** (0.23)             | 0.68** (0.23)             |
| Total Chronic Conditions    | -0.11* (0.04)             | -0.11* (0.04)             | -0.11* (0.04)             |
| Depressed                   | -0.84*** (0.16)           | -0.86*** (0.16)           | -0.82*** (0.15)           |
| Constant                    | 25.5*** (1.07)            | 25.6*** (1.03)            | 26.5*** (1.28)            |
| $R^2$                       | 0.31                      | 0.31                      | 0.31                      |
| $F$ (22, 6,593)             | 128.43***                 | 127.36***                 | 128.17***                 |

<sup>†</sup> $p < 0.1$ ; \* $p < 0.05$ ; \*\* $p < 0.01$ ; \*\*\* $p < 0.01$

**Supplemental Table S3.** Linear Regression Models of Associations between Cognitive Functioning and Perceived Neighborhood Characteristics by Gender and Years of Education among non-Hispanic Black Older Adults ( $n = 1044$ ).

|                             | Unsafe                    | Unclean                   | Social Discohesion        |
|-----------------------------|---------------------------|---------------------------|---------------------------|
| Variable                    | b (SE)                    | b (SE)                    | b (SE)                    |
| Neighborhood Characteristic | 0.48 (0.38)               | 0.36 (0.38)               | 0.57 (0.42)               |
| Woman                       | 0.18 (0.69)               | 0.80 (0.64)               | 0.99 (0.71)               |
| Education                   | 0.82*** (0.11)            | 0.79*** (0.11)            | 0.82*** (0.12)            |
| Woman x Neighborhood        |                           |                           |                           |
| Characteristic              | 0.14 (0.18)               | -0.05 (0.16)              | -0.13 (0.20)              |
| Education x Neighborhood    |                           |                           |                           |
| Characteristic              | -0.05 <sup>†</sup> (0.01) | -0.05 <sup>†</sup> (0.03) | -0.06 <sup>†</sup> (0.03) |
| Age                         | -0.16*** (0.03)           | -0.16*** (0.03)           | -0.16*** (0.03)           |
| Wave                        |                           |                           |                           |
| 2010 (reference)            |                           |                           |                           |
| 2012                        | 0.20 (0.40)               | 0.18 (0.39)               | 0.18 (0.39)               |
| 2014                        | -0.34 (0.57)              | -0.33 (0.56)              | -0.33 (0.55)              |
| 2016                        | -0.63 (0.53)              | -0.63 (0.52)              | -0.54 (0.54)              |
| Foreign Born                | -0.42 (0.81)              | -0.38 (0.77)              | -0.22 (0.78)              |
| Married/Partnered           | -0.11 (0.35)              | -0.12 (0.36)              | -0.14 (0.34)              |
| Ln Income                   | 1.04*** (0.22)            | 1.04*** (0.22)            | 1.08*** (0.22)            |
| Ln Wealth                   | 0.11 (0.09)               | 0.11 (0.09)               | 0.11 (0.10)               |
| Obese                       | 0.76** (0.28)             | 0.75* (0.28)              | 0.76 (0.28)               |
| Moderate/Vigorous Activity  |                           |                           |                           |
| Never (reference)           |                           |                           |                           |
| Sometimes                   | 0.94* (0.40)              | 0.94* (0.40)              | 0.93* (0.40)              |
| Often                       | 0.53 (0.37)               | 0.54 (0.37)               | 0.57 (0.37)               |
| Smoking Status              |                           |                           |                           |
| Never Smoked (reference)    |                           |                           |                           |
| Former Smoker               | -0.23 (0.27)              | -0.25 (0.27)              | -0.26 (0.27)              |
| Current Smoker              | -0.34 (0.48)              | -0.29 (0.49)              | -0.32 (0.48)              |
| Alcohol Use                 |                           |                           |                           |
| No Consumption (reference)  |                           |                           |                           |
| Moderate Consumption        | 0.94* (0.36)              | 0.95* (0.36)              | 0.93* (0.36)              |
| Heavy Consumption           | -0.16 (0.75)              | -0.21 (0.74)              | -0.30 (0.76)              |
| Total Chronic Conditions    | 0.07 (0.14)               | 0.09 (0.14)               | 0.10 (0.15)               |
| Depressed                   | -1.53*** (0.30)           | -1.55*** (0.31)           | -1.53*** (0.31)           |
| Constant                    | 15.2*** (1.07)            | 15.6*** (3.25)            | 14.7*** (3.32)            |
| $R^2$                       | 0.37                      | 0.37                      | 0.37                      |
| $F (22, 1,021)$             | 24.67***                  | 24.51***                  | 24.47***                  |

<sup>†</sup> $p < 0.1$ ; \* $p < 0.05$ ; \*\* $p < 0.01$ ; \*\*\* $p < 0.001$

**Supplemental Table S4.** Linear Regression Models of Associations between Cognitive Functioning and Perceived Neighborhood Characteristics by Gender and Years of Education among Mexican Older Adults ( $n = 363$ ).

|                                         | Unsafe                    | Unclean         | Social Discohesion |
|-----------------------------------------|---------------------------|-----------------|--------------------|
| Variable                                | b (SE)                    | b (SE)          | b (SE)             |
| Neighborhood Characteristic             | 0.36* (0.13)              | -0.07 (0.28)    | 0.22 (0.22)        |
| Woman                                   | 0.001 (0.20)              | -0.18 (0.97)    | 0.20 (0.84)        |
| Education                               | 0.40*** (0.04)            | 0.28*** (0.06)  | 0.34*** (0.05)     |
| Gender x Neighborhood Characteristic    | -0.06 (0.06)              | -0.07 (0.31)    | -0.19 (0.26)       |
| Education x Neighborhood Characteristic | -0.01 (0.02)              | 0.04* (0.01)    | 0.01(0.02)         |
| Age                                     | -0.23*** (0.04)           | -0.22*** (0.04) | -0.23*** (0.04)    |
| Wave                                    |                           |                 |                    |
| 2010 (reference)                        |                           |                 |                    |
| 2012                                    | -0.001 (0.29)             | 0.02 (0.30)     | -0.03 (0.32)       |
| 2014                                    | 0.77 (0.60)               | 0.76 (0.62)     | 0.72 (0.60)        |
| 2016                                    | 0.13 (0.57)               | 0.30 (0.55)     | 0.25 (0.57)        |
| Foreign Born                            | 0.33 (0.38)               | 0.35 (0.37)     | 0.31 (0.39)        |
| Married/Partnered                       | -0.18 (0.32)              | -0.01 (0.35)    | -0.10 (0.32)       |
| Ln Income                               | -0.15 <sup>†</sup> (0.08) | -0.21* (0.08)   | -0.17* (0.08)      |
| Ln Wealth                               | 0.23** (0.06)             | 0.21** (0.06)   | 0.23** (0.05)      |
| Obese                                   | -1.32** (0.37)            | -1.39** (0.37)  | -1.39** (0.33)     |
| Moderate/Vigorous Activity              |                           |                 |                    |
| Never (reference)                       |                           |                 |                    |
| Sometimes                               | 1.30** (0.40)             | 1.23* (0.42)    | 1.32** (0.42)      |
| Often                                   | 0.68 (0.57)               | 0.74 (0.61)     | 0.75 (0.62)        |
| Smoking Status                          |                           |                 |                    |
| Never Smoked (reference)                |                           |                 |                    |
| Former Smoker                           | 0.58 (0.38)               | 0.49 (0.40)     | 0.58 (0.41)        |
| Current Smoker                          | -1.36 <sup>†</sup> (0.64) | -1.40* (0.61)   | -1.35* (0.57)      |
| Alcohol Use                             |                           |                 |                    |
| No Consumption (reference)              |                           |                 |                    |
| Moderate Consumption                    | 2.29*** (0.27)            | 2.29*** (0.31)  | 2.29*** (0.33)     |
| Heavy Consumption                       | -0.36 (0.32)              | -0.33 (0.27)    | -0.44 (0.33)       |
| Total Chronic Conditions                | -0.10 (0.17)              | -0.12 (0.16)    | -0.11 (0.16)       |
| Depressed                               | -0.72 (0.55)              | -0.68 (0.52)    | -0.70 (0.55)       |
| Constant                                | 31.0 (3.40)               | 32.2*** (3.50)  | 31.5*** (3.41)     |
| $R^2$                                   | 0.40                      | 0.40            | 0.40               |
| $F (22, 340)$                           | 8.08***                   | 8.00***         | 8.02***            |

<sup>†</sup>p < 0.1; \*p < 0.05; \*\*p < 0.01; \*\*\*p < 0.01

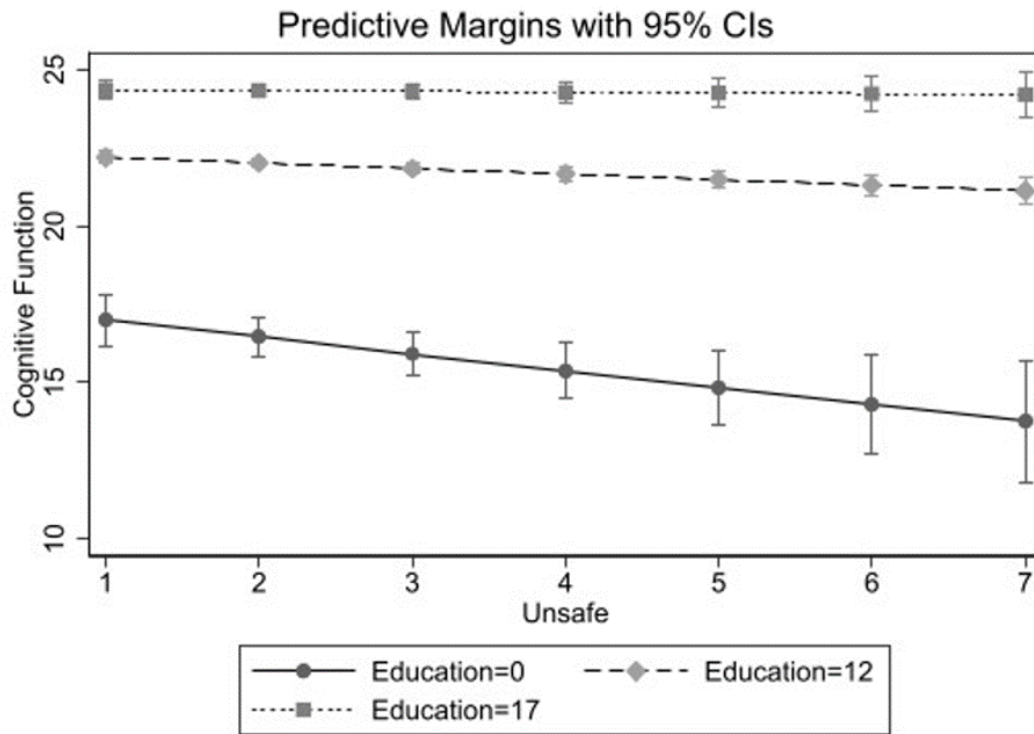

**Supplemental Figure 1.** Perceived Unsafe Neighborhood by Years of Education Predicting Cognitive Functioning among Non-Hispanic White Older Adults (n=6,616).

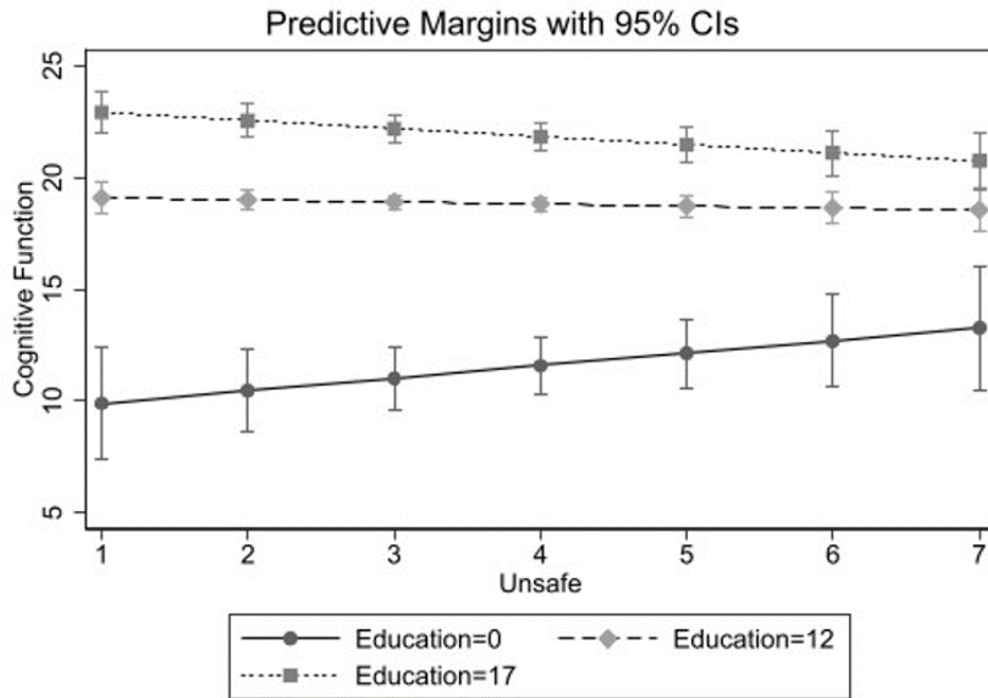

**Supplemental Figure 2.** Perceived Unsafe Neighborhood by Years of Education Predicting Cognitive Functioning among Non-Hispanic Black Older Adults (n=1,044).

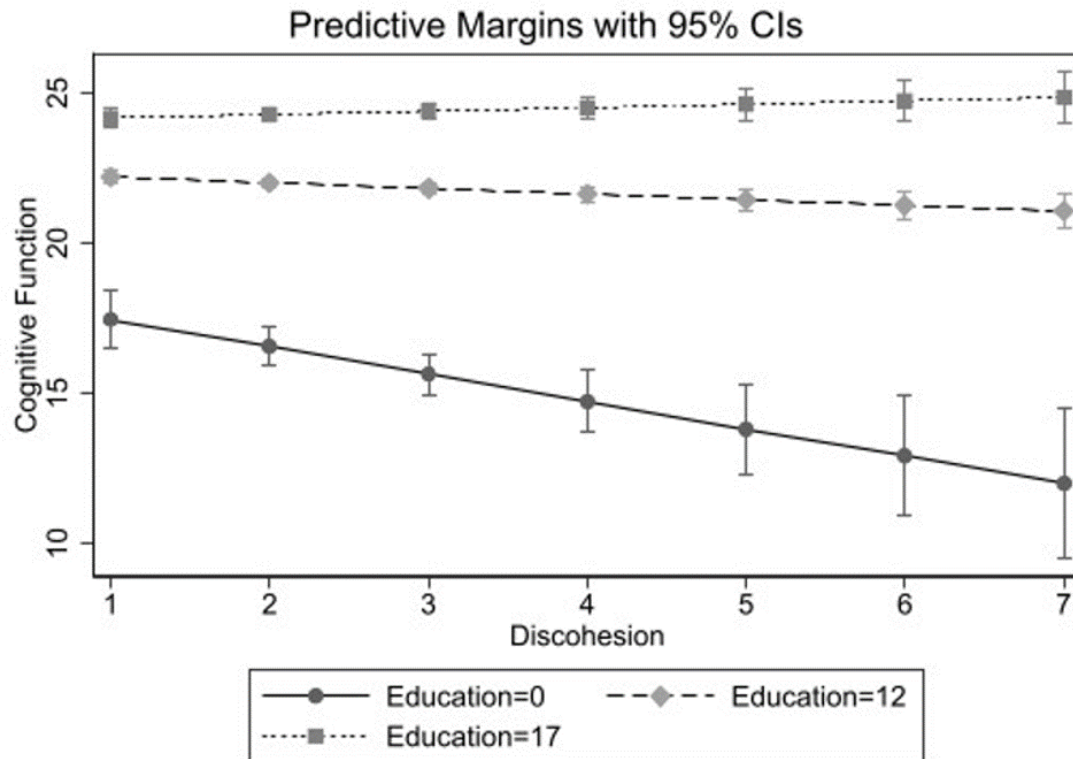

**Supplemental Figure 3.** Perceived Social Discohesion by Years of Education Predicting Cognitive Functioning among Non-Hispanic White Older Adults (n=6,616).

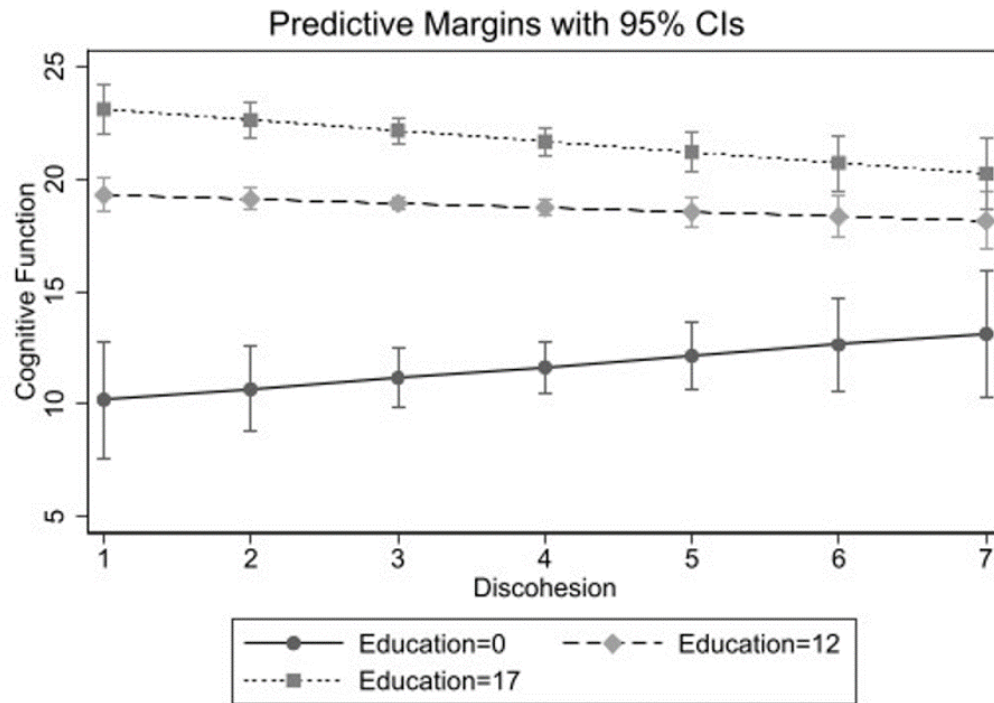

**Supplemental Figure 4.** Perceived Social Discohesion by Years of Education Predicting Cognitive Functioning among Non-Hispanic Black Older Adults (n=1,044).
